# Supplementary material for: An Observational Tool to Assess Activity Limitation in Ambulatory People with Cerebral Palsy When Performing Motor Skills
Source: Int J Environ Res Public Health. 2020 Mar 14;17(6):1896. doi: 10.3390/ijerph17061896 (PMC7142872; doi:10.3390/ijerph17061896)
Supplement: Supplementary file 1 [file ijerph-17-01896-s001.zip › supplementary file S2.xlsx]

## Sheet: HEXAGON Hop Test
HEXAGON HOP TEST
Beekhuizen, Davis, Kolber & Cheng (2009). Test-retest reliability and minimal detectable change of the hexagon agility test. Journal of Strength and Conditionaling Research, 23(7), 2167-2171.
DESCRIPTION								CLASS			KEY OBSERVATION								VIDEO
								BILATERAL SPASTICITY DIPLEGIA			- Athlete has problems of coordination. Problems of coordination are more evident when fatigue appears. He doesn’t able to dissociate between pelvis and legs. - Athlete shows: o Scissor patterns legs. o Difficult to keeps hands on hips.
A hexagon with 60 cm sides and 120-degrre angles is marked with tape on a hard-surface floor with tape strip in the middle to amr the starting position. The test began with the subject standing on the tape strip placed in the middle of the hexagon, which marks the starting location. The tester fave the command "Ready, go" and starts the stopwathc. On the "Go" command, the participant began jumpin…
								DYSKINESIA ATAXIA			- The athlete has problems with coordination. - The athlete has problems with balance that are more evident when he lands backwards. Thus, he needs to use compensatory strategies such us: o Moving hips forward to improve balance. o Higher use of trunk and hips. - The athlete also shows: o Slower speed and lack of fluent movements. o Difficulties for changing direction. o Double jumps to get stabi…
								UNILATERAL SPASTICITY HEMIPLEGIA			- The athlete has an assymmetric arms and legs involvement. He does not able to coordinate the four limbs properly. - The athlete has coordination limitations and he is not able to keep rhythm. - The athlete also shows: o Smaller amplitude of the step with the impaired body side. o Differences between legs on push off. o Difficulties to keep legs together when hoppoing.

## Sheet: MAT Test
MODIFIED AGILITY TEST (MAT)
Reina, R., Sarabia, J.M., Yanci, J., García-Vaquero, M.P., & Campayo-Piernas, M. (2017). Change of direction ability performance in cerebral palsy football players according to functional profiles. Frontiers in Physiology, 6, 409.
TEST DESCRIPTION								ATHLETE´S PROFILE			KEY OBSERVATION FEATURES								VIDEO
								BILATERAL SPASTICITY OR DIPLEGIA			- The Athlete shows balance problems especially in backwards actions due to limited heel contact with the ground. Thus, he/she uses compensatory strategies such as: o Head movements for body alignment. o Trunk extension for weight-bearing. - The athlete has limited ROM, mainly: o Limited hips ROM provokes that the athlete needs to turn the whole body. o Scissor running pattern due to distal spast…
The athlete runs the MAT course as fast as possible with the following directions: 1. A-B (5 m): sprinting forward to cone B and touching the top of it with the right hand. 2. B-C (2.5 m): moving laterally without crossing the feet, the athlete runs to cone C and touches its top with the left hand. 3. C-D (5 m): running laterally to cone D and touching its top with the right hand. 4. D-B (2.5 m):…
								DYSKINESIA / ATAXIA			- The athlete shows balance problems, especially when performing changes of direction. - Involuntary movements by athetosis or dystonia of the upper limbs may impact on movement´s fluency. - During the performance, the athlete also shows: o Difficulty achieving accelerations. o Lack of explosive movements in start actions and changing directions. o Use the trunk to propel the whole body.
								UNILATERAL SPASTICITY OR HEMIPLEGIA			- The athlete has balance problems, using compensatory strategies such as: o Turning of the head. o Swinging the arms (especially the arm of the unimpaired body side) - The asymmetry between body sides is clearly observed when running backwards (no or reduced heel contact) and when performing lateral displacements (unstable towards the impaired side) - The athlete also shows: o Problems to keep r…

## Sheet: Rapid Heel-Toe
RAPID HEEL-TOE TEST
Beckman, E. & Tweedy, S. (2009). Towards evidence-based classification in Paralympic athletics: evaluating the validity of activity limitation tests for use in classification of Paralympic running events. British Journal of Sports Medicine, 43(13), 1067-1072.
TEST DESCRIPTION								ATHLETE´S PROFILE			KEY OBSERVATION FEATURES								VIDEO
								BILATERAL SPASTICITY OR DIPLEGIA			- The athlete shows balance problems, presenting compensatory strategies such as holding the chair to keep balance. - The athlete presents coordination problems in both legs due to poor selective motor control to alternate plantar- and dorsiflexion. - ROM is limited due to high levels of distal spasticity (i.e. calf muscles). In consequence, the amplitude of the movement is higher from the proxim…
The athlete sits barefoot on a chair and tries to touch the corners of 20 x 30 cm rectangle on the floor. The athlete alternes heel and toe in each corner, first left-to-right (clockwise) then around right-to-left (anticlockwise). The test is performed twice, with the left foot and with the right foot from the bottom right and left corners, respectively. Test Outcome: Time (s) is measured for the…
								DYSKINESIA / ATAXIA			- The athlete shows coordination problems in both feet and he/she is unable to keep the rhythm. - The athlete also shows: o Slow movements. o Usually, he/she needs to hold the chair to perform the test. o Due to ataxia, he/she has difficulties in controlling hip/pelvis. o Accuracy problems (i.e. dysmetria)
											- The athlete has a limited ROM in the impaired side (i.e. lack of plantar flexion and dorsiflexion). In consequence, he/she is not able to achieve heel strike on box corners. - The athlete shows asymmetry problems with noticeable performance differences between legs. - The athlete also shows: o Wriggling movements on the seat to achieve the goal of the test when performing with the impaired side…
								UNILATERAL SPASTICITY OR HEMIPLEGIA

## Sheet: Running on Place
RUNNING ON PLACE
Bicici, S., Vanlandewijck, Y., & Tweedy, S. (2012). Development of a test battery for improving classification reliability for ambulant athletes affected by hypertonia, ataxia or athetosis. Unpublished Master Thesis Erasmus Mundus Program on Adapted Physical Activity: KU Lueven, Belgium.
TEST DESCRIPTION								ATHLETE´S PROFILE			KEY OBSERVATION FEATURES								VIDEO
								BILATERAL SPASTICITY OR DIPLEGIA			- The athlete has balance problems that he/she compensates with a wider base stance and a larger contact surface with the soles of the foot. - The athlete presents coordination problems which difficult the movement cadence and the synergy between upper and lower limbs (i.e. the arms move faster than the legs) - During the test performance, the athlete also shows: o Difficulties to reach appropria…
On the signal “go”, the athlete begins stepping (not running) in place (i.e. a 40 cm line) as fastest as possible until complete 25 cycles (i.e. one step with each foot is a cycle). The tester counts the correct cycles out loud, if there is an incorrect one, tester repeated the same number until a proper cycle is performed. Outcome: Time needed to complete 25 correct cycles (in seconds)
								DYSKINESIA / ATAXIA			- The athlete has balance problems, which compensates performing movement forwards and backwards (i.e. difficulties staying in place) - The athlete shows coordination problems which difficult that the upper limbs work at the same time as the lower limbs and both legs from stepping alternately on the ground. - The athlete also shows: o Lack of speed. o Inconsistency in steps, having to force small…
								UNILATERAL SPASTICITY OR HEMIPLEGIA			- The athlete has balance problems, using compensatory strategies such as: o Wide base stance. o Trunk flexion to the less affected side. o Larger range of movement with hips and knees of the unimpaired body side. - Coordination problems appear especially when speed is increased and he/she is not able to coordinate upper with lower limbs. - The athlete exhibits a noticeable asymmetry between body…

## Sheet: Side-Stepping
SIDE-STEPPING
Beckman, E. & Tweedy, S. (2009). Towards evidence-based classification in Paralympic athletics: evaluating the validity of activity limitation tests for use in classification of Paralympic running events. British Journal of Sports Medicine, 43(13), 1067-1072.
TEST DESCRIPTION								ATHLETE´S PROFILE			KEY OBSERVATION FEATURES								VIDEO
								BILATERAL SPASTICITY OR DIPLEGIA			- The athlete presents coordination and balance problems due to the test requires performing actions with both lower limbs at the same time. - The athlete shows ROM limitations especially in hips (adduction + internal rotation) and ankle (inversion) joints constraining balance and the amplitude of the movement. - During the test performance, the athlete also shows: o Difficulties to maintain the …
The athlete stands between two lines separated 40 cm with legs slightly apart. The athlete jumps opening symmetrically the legs, stepping out of the lines, and then, jumps again closing the legs and get back inside the lines (i.e. abduction-adduction cycle of the legs). This is one complete cycle. The arms can be moved freely during the test. Outcome: Time (s) needed to complete 15 correct cycles…
								DYSKINESIA / ATAXIA			- The athlete has balance problems, so he/she uses compensatory strategies such as lowering the centre of gravity by flexing the knees and getting an excessive opening of the legs to increase the base of support. - The athlete has coordination problems which make difficult to keep up with the pace of the task. - The athlete also shows: o Slow execution of the test due to the big strides performed…
								UNILATERAL SPASTICITY OR HEMIPLEGIA			- The athlete has balance problems, using compensatory strategies such as: o Fixing arms or step back when splitting legs. o Bearing the body weight to the unimpaired side due to the limited contact on the ground with the impaired foot. - The athlete has coordination and asymmetry problems and the less impaired side drive the execution pattern and the rhythm and pulls the impaired side. - ROM is …

## Sheet: 40 m. Sprint
40 m SPRINT
Reina, R., Sarabia, J.M., Caballero, C., & Yanci, J. (2017). How does the ball influence the performance of change of direction and sprint tests in para-footballers with brain impairments? Implications for evidence-based classification in CP-Football. PLoS One, 12(11).
TEST DESCRIPTION								ATHLETE´S PROFILE			KEY OBSERVATION FEATURES								VIDEO
								BILATERAL SPASTICITY OR DIPLEGIA			- The athlete presents ROM limitations due to spasticity in hip and ankle joints. During the test performance, the athlete usually shows: i) aerial phase is limited by spasticity, ii) short and frequent strides to maintain balance, iii) more time is required to reach the maximum speed, and iv) appearance of fatigue and greater coordination problems in the last meters of the test.
The 40m sprint test is a simple test used to measure an athlete's ability to accelerate. The athletes must perform the test at their maximum speed. Timing light gates were positioned at the start line (0 m), 10, 25, and 40 m (endline) to measure acceleration and top-speed. Outcome: time (s) to complete 10, 25 and 40 m.
								DYSKINESIA / ATAXIA			- The athlete presents coordination problems, which difficult to perform a proper running pattern, especially coordinating upper and lower limbs. - The athlete shows ROM limitations that it is easier to observe in: o Rotation of the trunk. o Reduced extension of hips and knees. - During test performance, the athlete shows:: o Difficulties to speed-up (i.e. acceleration) o Slower or unpaced moveme…
								UNILATERAL SPASTICITY OR HEMIPLEGIA			- The athlete shows coordination and asymmetry problems, especially performing the running mechanics when comparing body sides (e.g. arm flexed of the hemiplegic side) - The athlete also shows ROM limitations, especially in the shoulder (limiting arm swing) and hip (limiting stride length) of the most impaired side. - During test performance, the athlete shows: o Need to perform harder with the l…

## Sheet: Stop and Go
STOP and GO
Reina, R., Sarabia, J.M., Caballero, C., & Yanci, J. (2017). How does the ball influence the performance of change of direction and sprint tests in para-footballers with brain impairments? Implications for evidence-based classification in CP-Football. PLoS One, 12(11).
TEST DESCRIPTION								ATHLETE´S PROFILE			KEY OBSERVATION FEATURES								VIDEO
								BILATERAL SPASTICITY OR DIPLEGIA			- The athlete shows coordination problems with limited dissociation between legs. - The athlete presents ROM limitations like limited ankle dorsiflexion which makes athletes run using the toes, causing a very small base of support which impacts on the dynamic balance. In consequence, short strides are usually observed. - The athlete also presents: o Slow accelerating and decelerating skills. o Po…
The athlete stands without support behind the starting line. After the signal ("GO!") the athlete run (1) to a mat (10 m) and stopped completely on the mat (2) with both feet where he/she remains for 2 seconds until a beep sounds. Then, the athlete runs again (3) to the next mat (10 m) and stop again until the next beep (4), and then, he/she continues running until the end of the test (5). Total …
								DYSKINESIA / ATAXIA			- The athlete has balance problems that are magnified when he/she passes from a dynamic task (running) to a static one (stop on the mat). - The athlete shows coordination problems, not being able to coordinate upper and lower limbs, which impacts the transfer from static to dynamic actions or vice-versa. - The athlete also shows: o Asymmetrical use of arms (i.e. not contributing to momentum) o Ac…
								UNILATERAL SPASTICITY OR HEMIPLEGIA			- The athlete shows coordination problems that cause difficulties to move the body properly. For example, the most functional side needs to pull the weaker or impaired side. - The athlete presents ROM limitations, especially in the most impaired foot, which reduces the support area causing balance problems. - When performing, the athlete also shows: o An overuse of most functional side to start/s…

## Sheet: 10 m. Skip
10 m SKIP
Beckman, E. & Tweedy, S. (2009). Towards evidence-based classification in Paralympic athletics: evaluating the validity of activity limitation tests for use in classification of Paralympic running events. British Journal of Sports Medicine, 43(13), 1067-1072.
TEST DESCRIPTION								ATHLETE´S PROFILE			KEY OBSERVATION FEATURES								VIDEO
								BILATERAL SPASTICITY OR DIPLEGIA			- The athlete shows coordination problems due to lower limbs spasticity, which makes difficult performing the skipping pattern and maintain it for a period of time. - The athlete has reduced ROM due to spasticity that causes: o Need for the trunk and head to help elevate the legs. o Tight stiff muscles involved in the running pattern. o Poor knees elevation and therefore little flight phases and …
Skipping is a combination of a long step and a hop (step–hop), first on one foot and then on the other, and has an uneven rhythm. To perform the test, several markers are placed at 0, 10, and 20 m, two pairs of infrared timing gates are positioned at the 10 and 20 m markers. The athlete accelerates over the first 10 m so that he/she reaches the maximum speed when reaching the first time gate (10 …
								DYSKINESIA / ATAXIA			- The athlete has balance problems which are easier to observe during the landing phases. The athlete uses compensatory strategies such as: o Using the upper extremities, putting them away from the body to keep balance. o Extension of the trunk to modify the centre of gravity and keep the balance. - Difficulties to perform a fluent and accurate hopping mechanics. - The athlete also shows: o Coord…
								UNILATERAL SPASTICITY OR HEMIPLEGIA			- The athlete present ROM limitations in the impaired side, which impact is clearly seen in the hip joint (i.e. reduced hip flexion) - Asymmetry is clearly observed because each knee has a different degree of flexion. - The athlete also shows: o Flexed arm posture on the impaired side. o Poor fluency of the movement. o Use the trunk to speed-up the body. o Shorter steps with the impaired side.

## Sheet: Side Step
SIDE-STEP
Springer, B.A., Marin, R., Cyhan, T., Roberts, H., & Gill, N.W. (2007). Normative values for the unipedal stance test with eyes open and closed. Journal of Geriatric Physical Therapy, 30(1), 8-15.
TEST DESCRIPTION								ATHLETE´S PROFILE			KEY OBSERVATION FEATURES								VIDEO
								BILATERAL SPASTICITY OR DIPLEGIA			- The athlete shows balance problems, especially in the landing phases regarding trunk instability. - The athlete presents limited ROM clearly identified in: o Limited hips abduction. o Ankle dorsiflexion. - The athlete shows: o Short strides length. o Slow execution (i.e. movement execution requires long preparation)
The side-step test is performed barefoot without support, and it is carried out with both sides. A starting line and a 10-m line perpendicular to this are marked on the floor. The athlete steps to one side (e.g. right) and touches a line with the closest foot, step back to the centre then steps to the other side, then back to the centre. This is one complete cycle. The athlete performed five repe…
								DYSKINESIA / ATAXIA			- The athlete presents balance problems in static and dynamic situations, which are compensated through: o Short steps on both sides. o Getting back to mid-line as fast as possible. o Performing little rotations with the trunk to gain more stability. - The athlete shows coordination problems, especially to dissociate body regions. - The athlete shows limited ROM that compensates performing extern…
								UNILATERAL SPASTICITY OR HEMIPLEGIA			- The athlete has balance problems in the most impaired side that he/she compensates through: o Moving away from the body the arm of the non-impaired side to gain balance. o Using an extra (short) step. o Constantly shifting weight from one foot to another. - The athlete has ROM limitations: o Presence of ankle dorsiflexion which makes difficult to place the foot completely on the ground, creatin…				- The athlete shows asymmetry between body sides causing: o Lack of movement fluency. o Inconsistent mechanics between steps. o Poor pushing off with the most impaired side.

## Sheet: Tandem Walk
TANDEM WALK
Bicici, S., Vanlandewijck, Y., & Tweedy, S. (2012). Development of a test battery for improving classification reliability for ambulant athletes affected by hypertonia, ataxia or athetosis. Unpublished Master Thesis Erasmus Mundus Program on Adapted Physical Activity: KU Lueven, Belgium.
TEST DESCRIPTION								ATHLETE´S PROFILE			KEY OBSERVATION FEATURES								VIDEO
								BILATERAL SPASTICITY OR DIPLEGIA			- The athlete shows balance problems, which compensate with lots of trunk sways to keep posture. - The athlete has ROM limitations, showing scissors gait patterns due to the tightness of hip adductors, causing legs to cross the midline.
The athlete is asked to walk with one foot behind the other so that the big toe of one foot is touching the heel of the other foot (i.e. heel-to-toe). The test is performed on a line as fastest as possible, avoiding stepping outside the marked line and with both arms cross on the chest. It is evaluated: a) The time to complete 10 corrects steps (heel needs to touch the toe during each step) b) Th…
								DYSKINESIA / ATAXIA			- The athlete has balance problems that he/she compensates: o Moving away arms from the body. o Moving the trunk forward and backwards. - Due to ataxia, the athlete has problems with coordination, performing inaccurate movements. - The athlete shows: o Accuracy is constrained, performing steps outside of the line. o Involuntary movements due to presence of athetosis/dystonia. o Slow and clumsy mo…
								UNILATERAL SPASTICITY OR HEMIPLEGIA			- The athlete has problems with balance, tending to lean the trunk to the less impaired side to gain stability. - The stiffness and weakness in the impaired side cause clear asymmetry when moving and walking. - The athlete shows: o Shorter steps on the more impaired side. o Poor knee elevation in the impaired leg due to muscle stiffness. o Difficult to keep balance when the athlete uses the most …

[truncated: 4 more sheets: Four Bounds for Distance, Triple Hop for Distance, Standing Broad Jump, Split Jumps]
